# Supplementary material for: Successful Treatment of Refractory and Relapsed CNS Acute Lymphoblastic Leukemia With CD-19 CAR-T Immunotherapy: A Case Report
Source: PubMed Central journal article supplement (PMC8427303; doi:10.3389/fonc.2021.699946), 2021-08-26

# Supplemental Figure 1

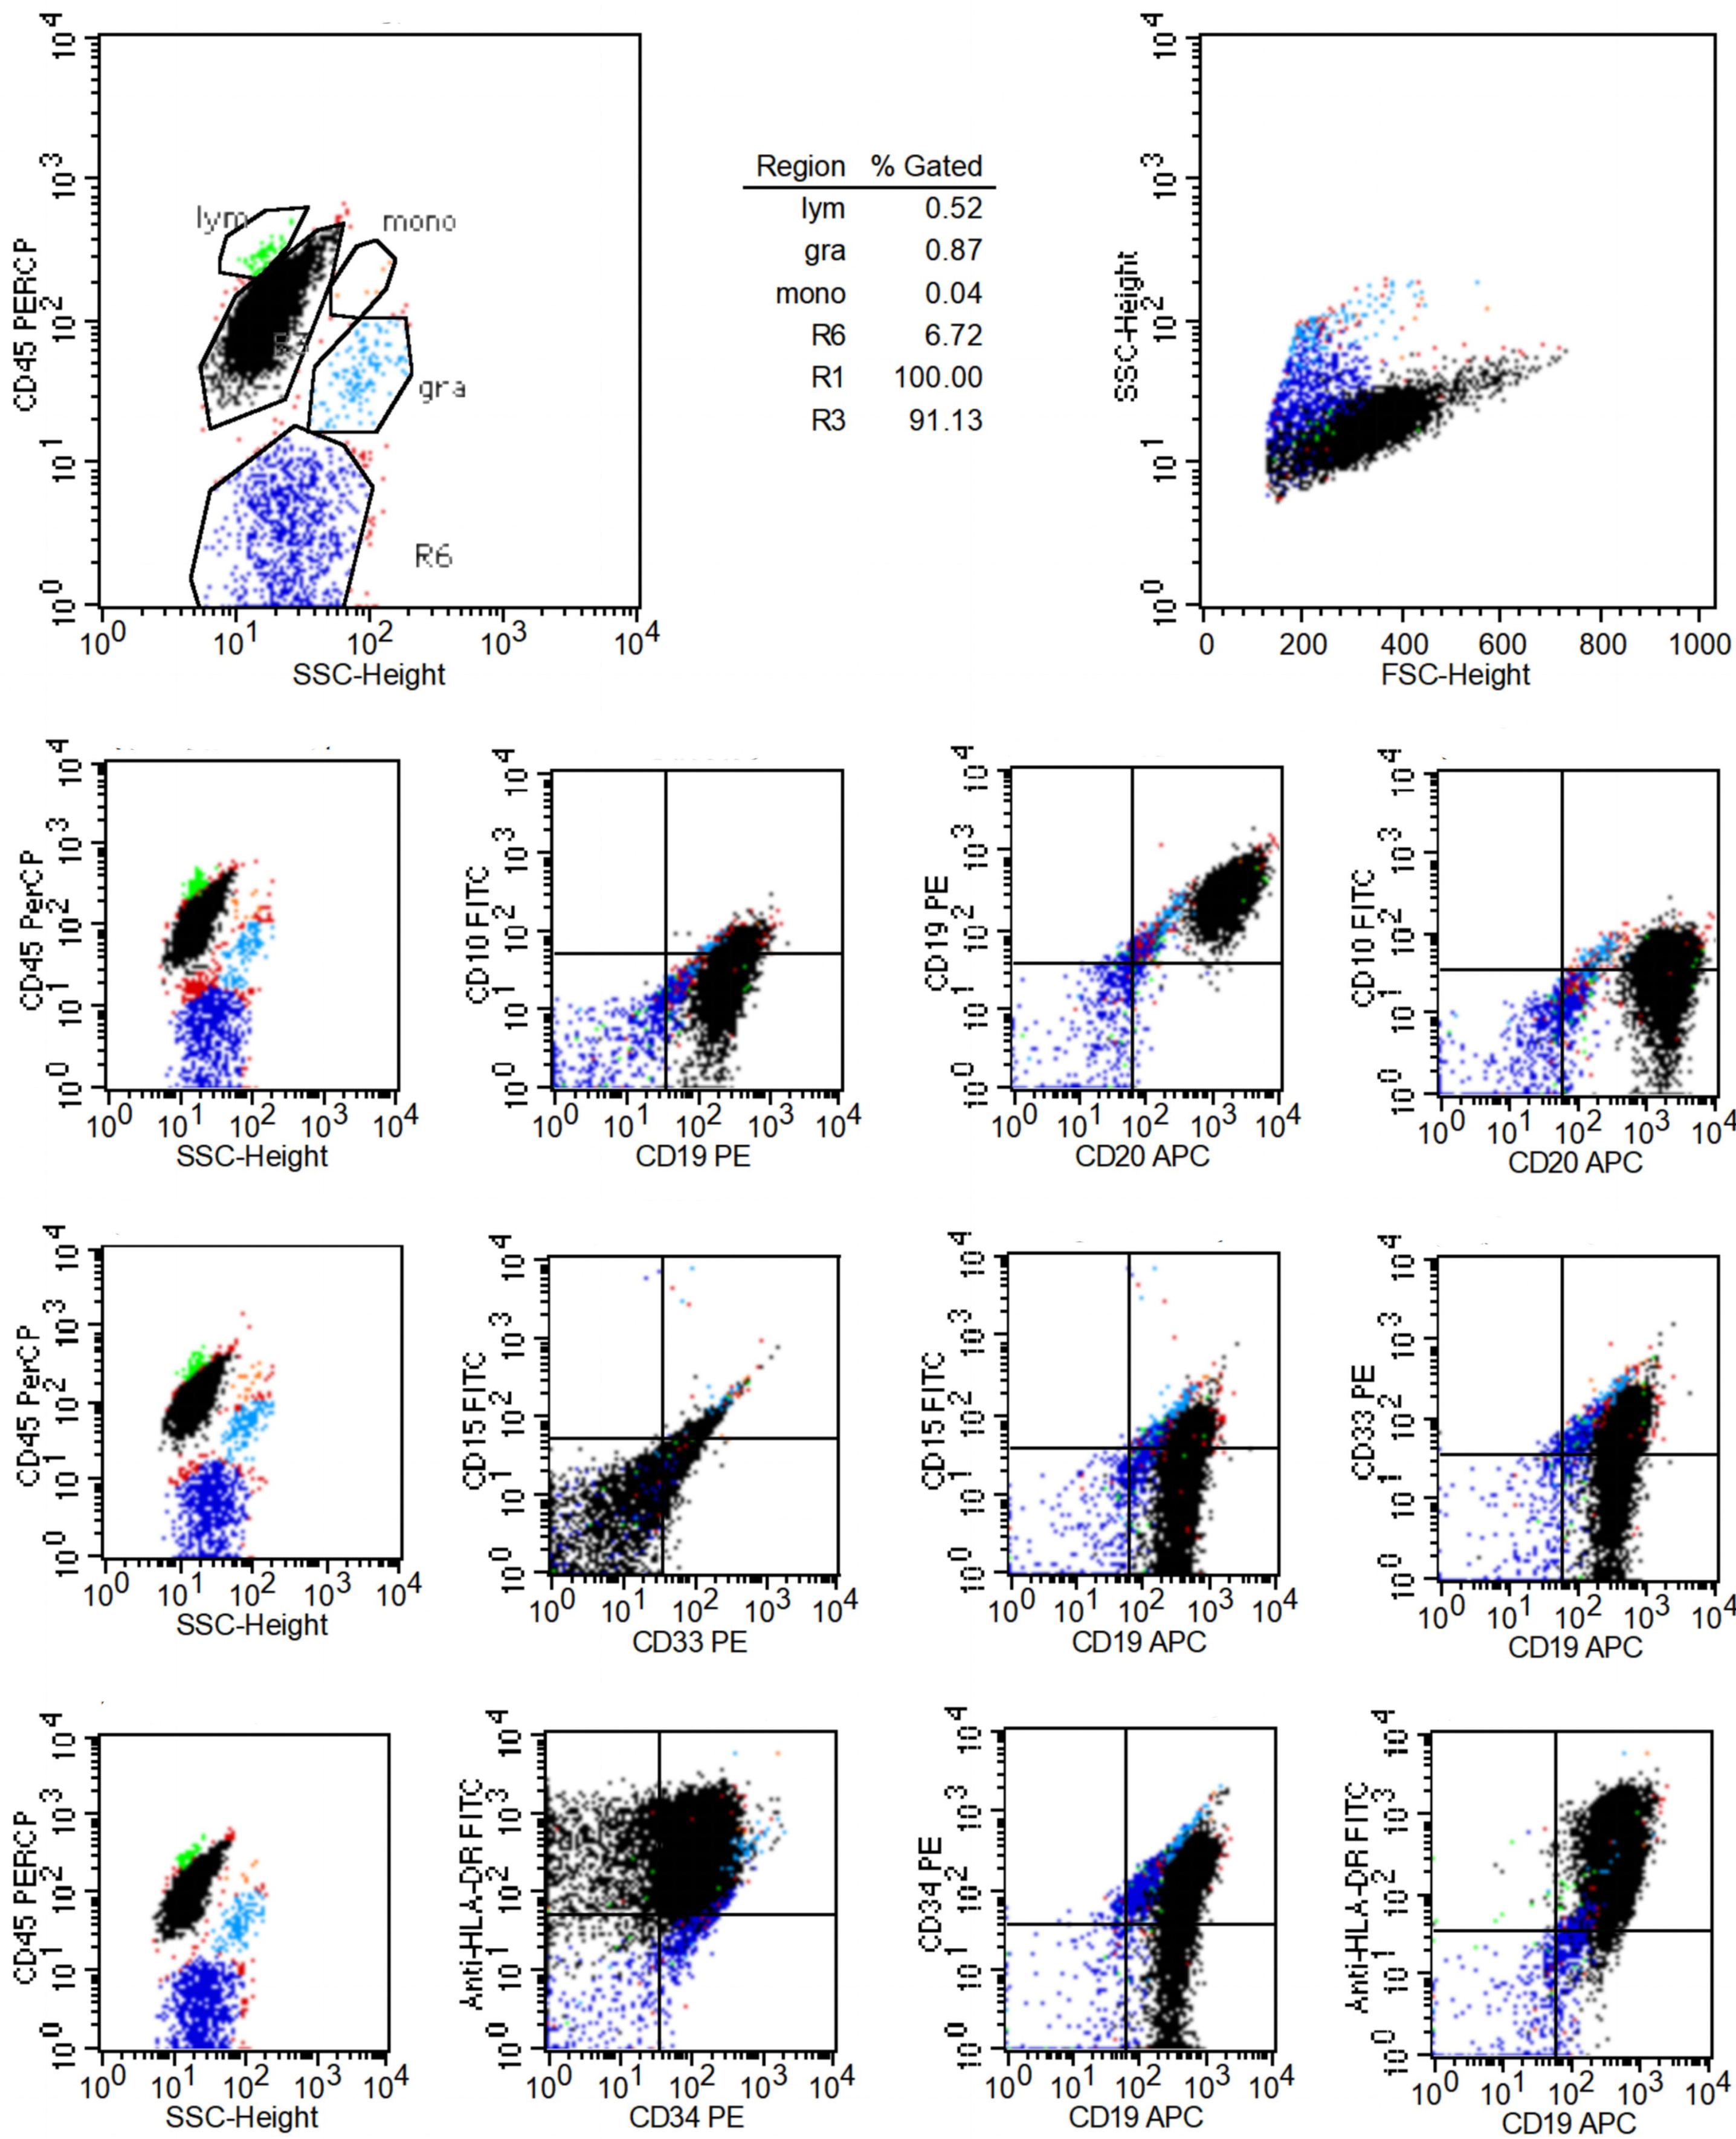

# Supplemental Figure 2

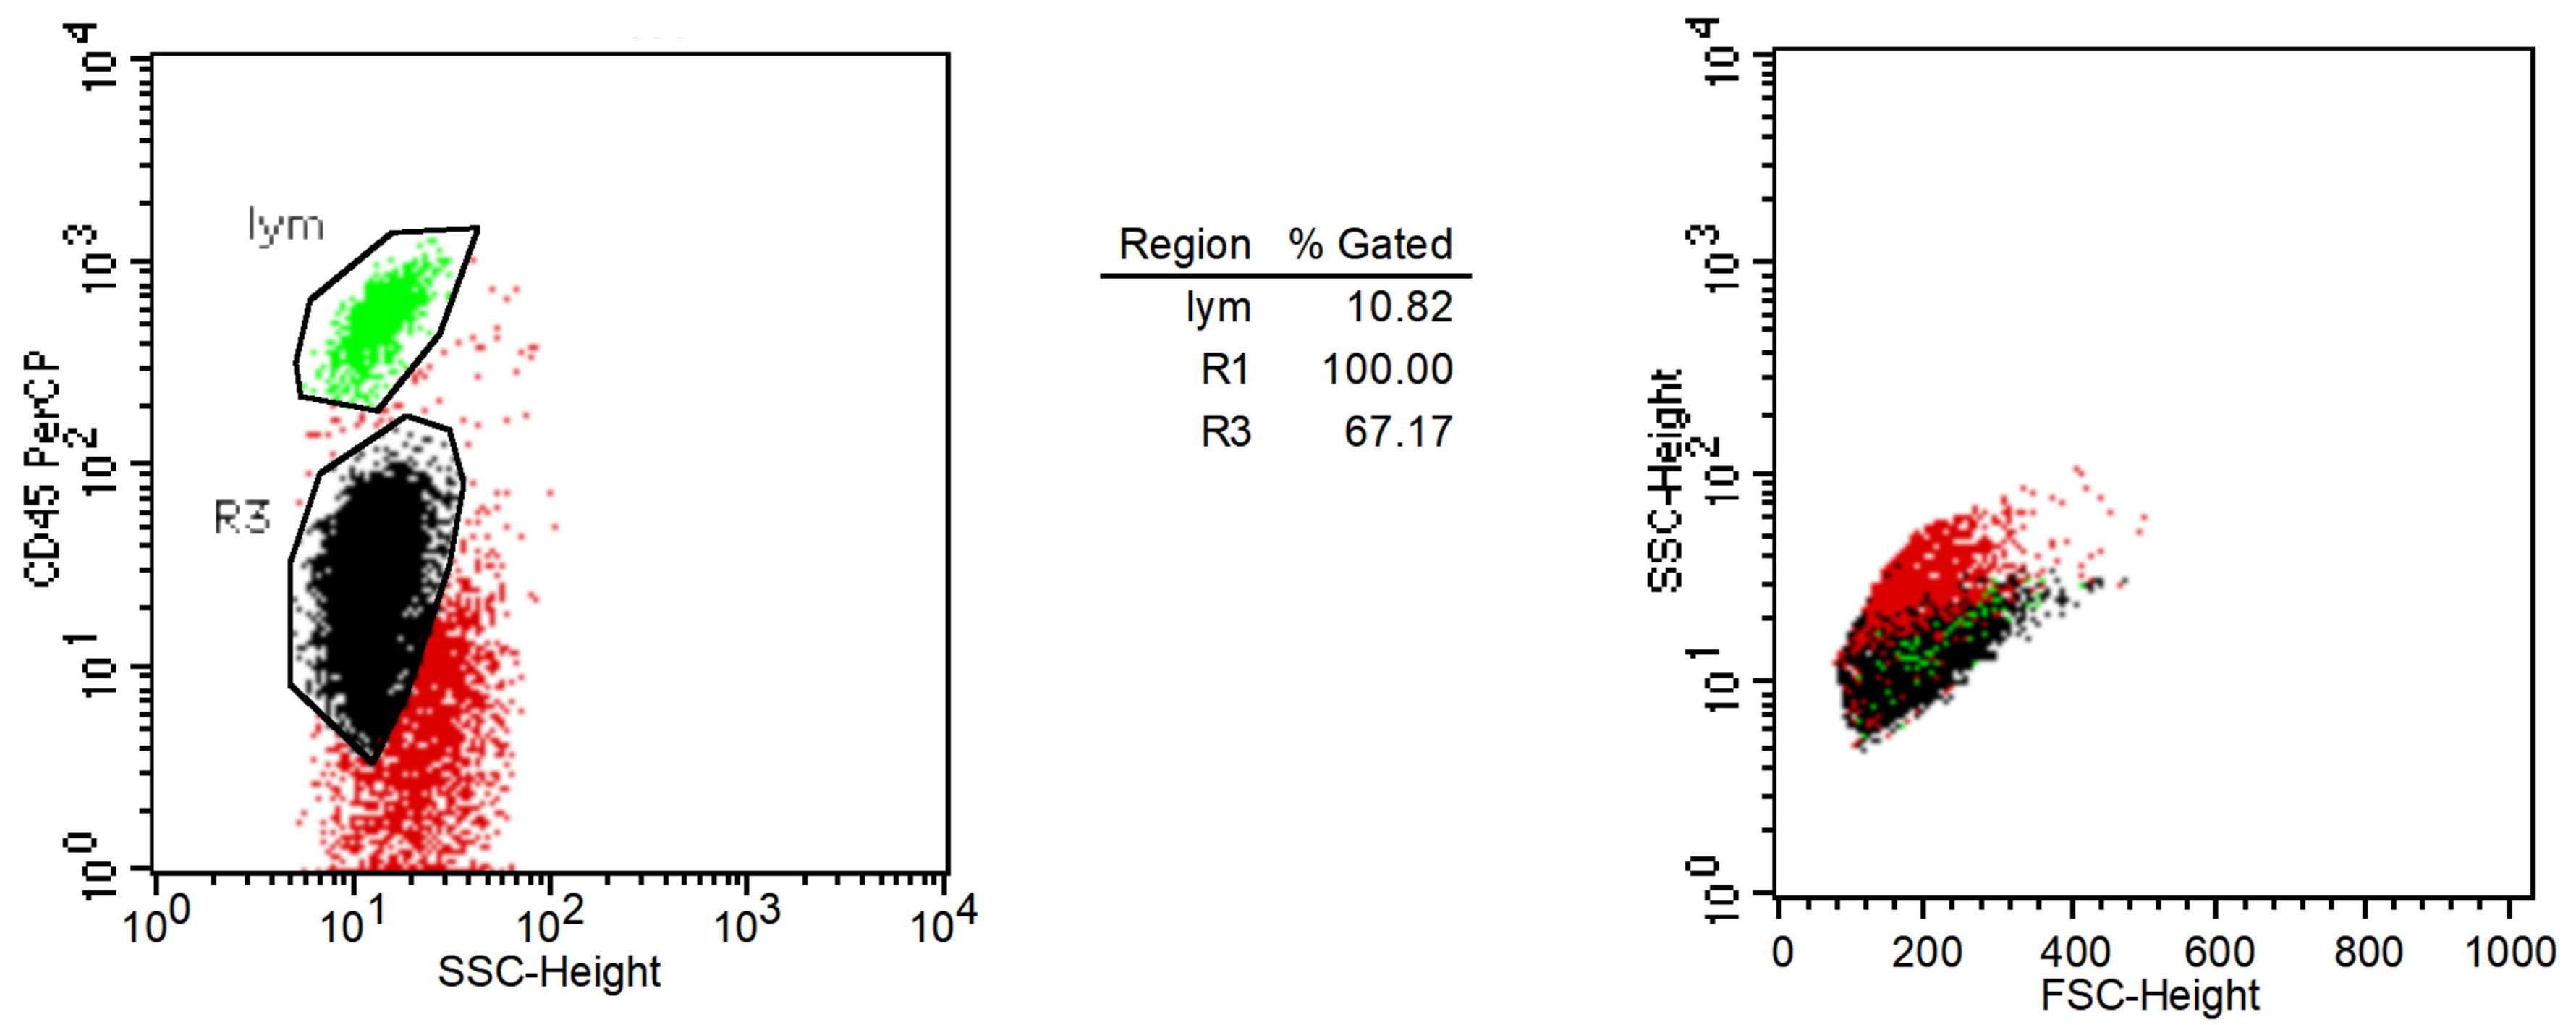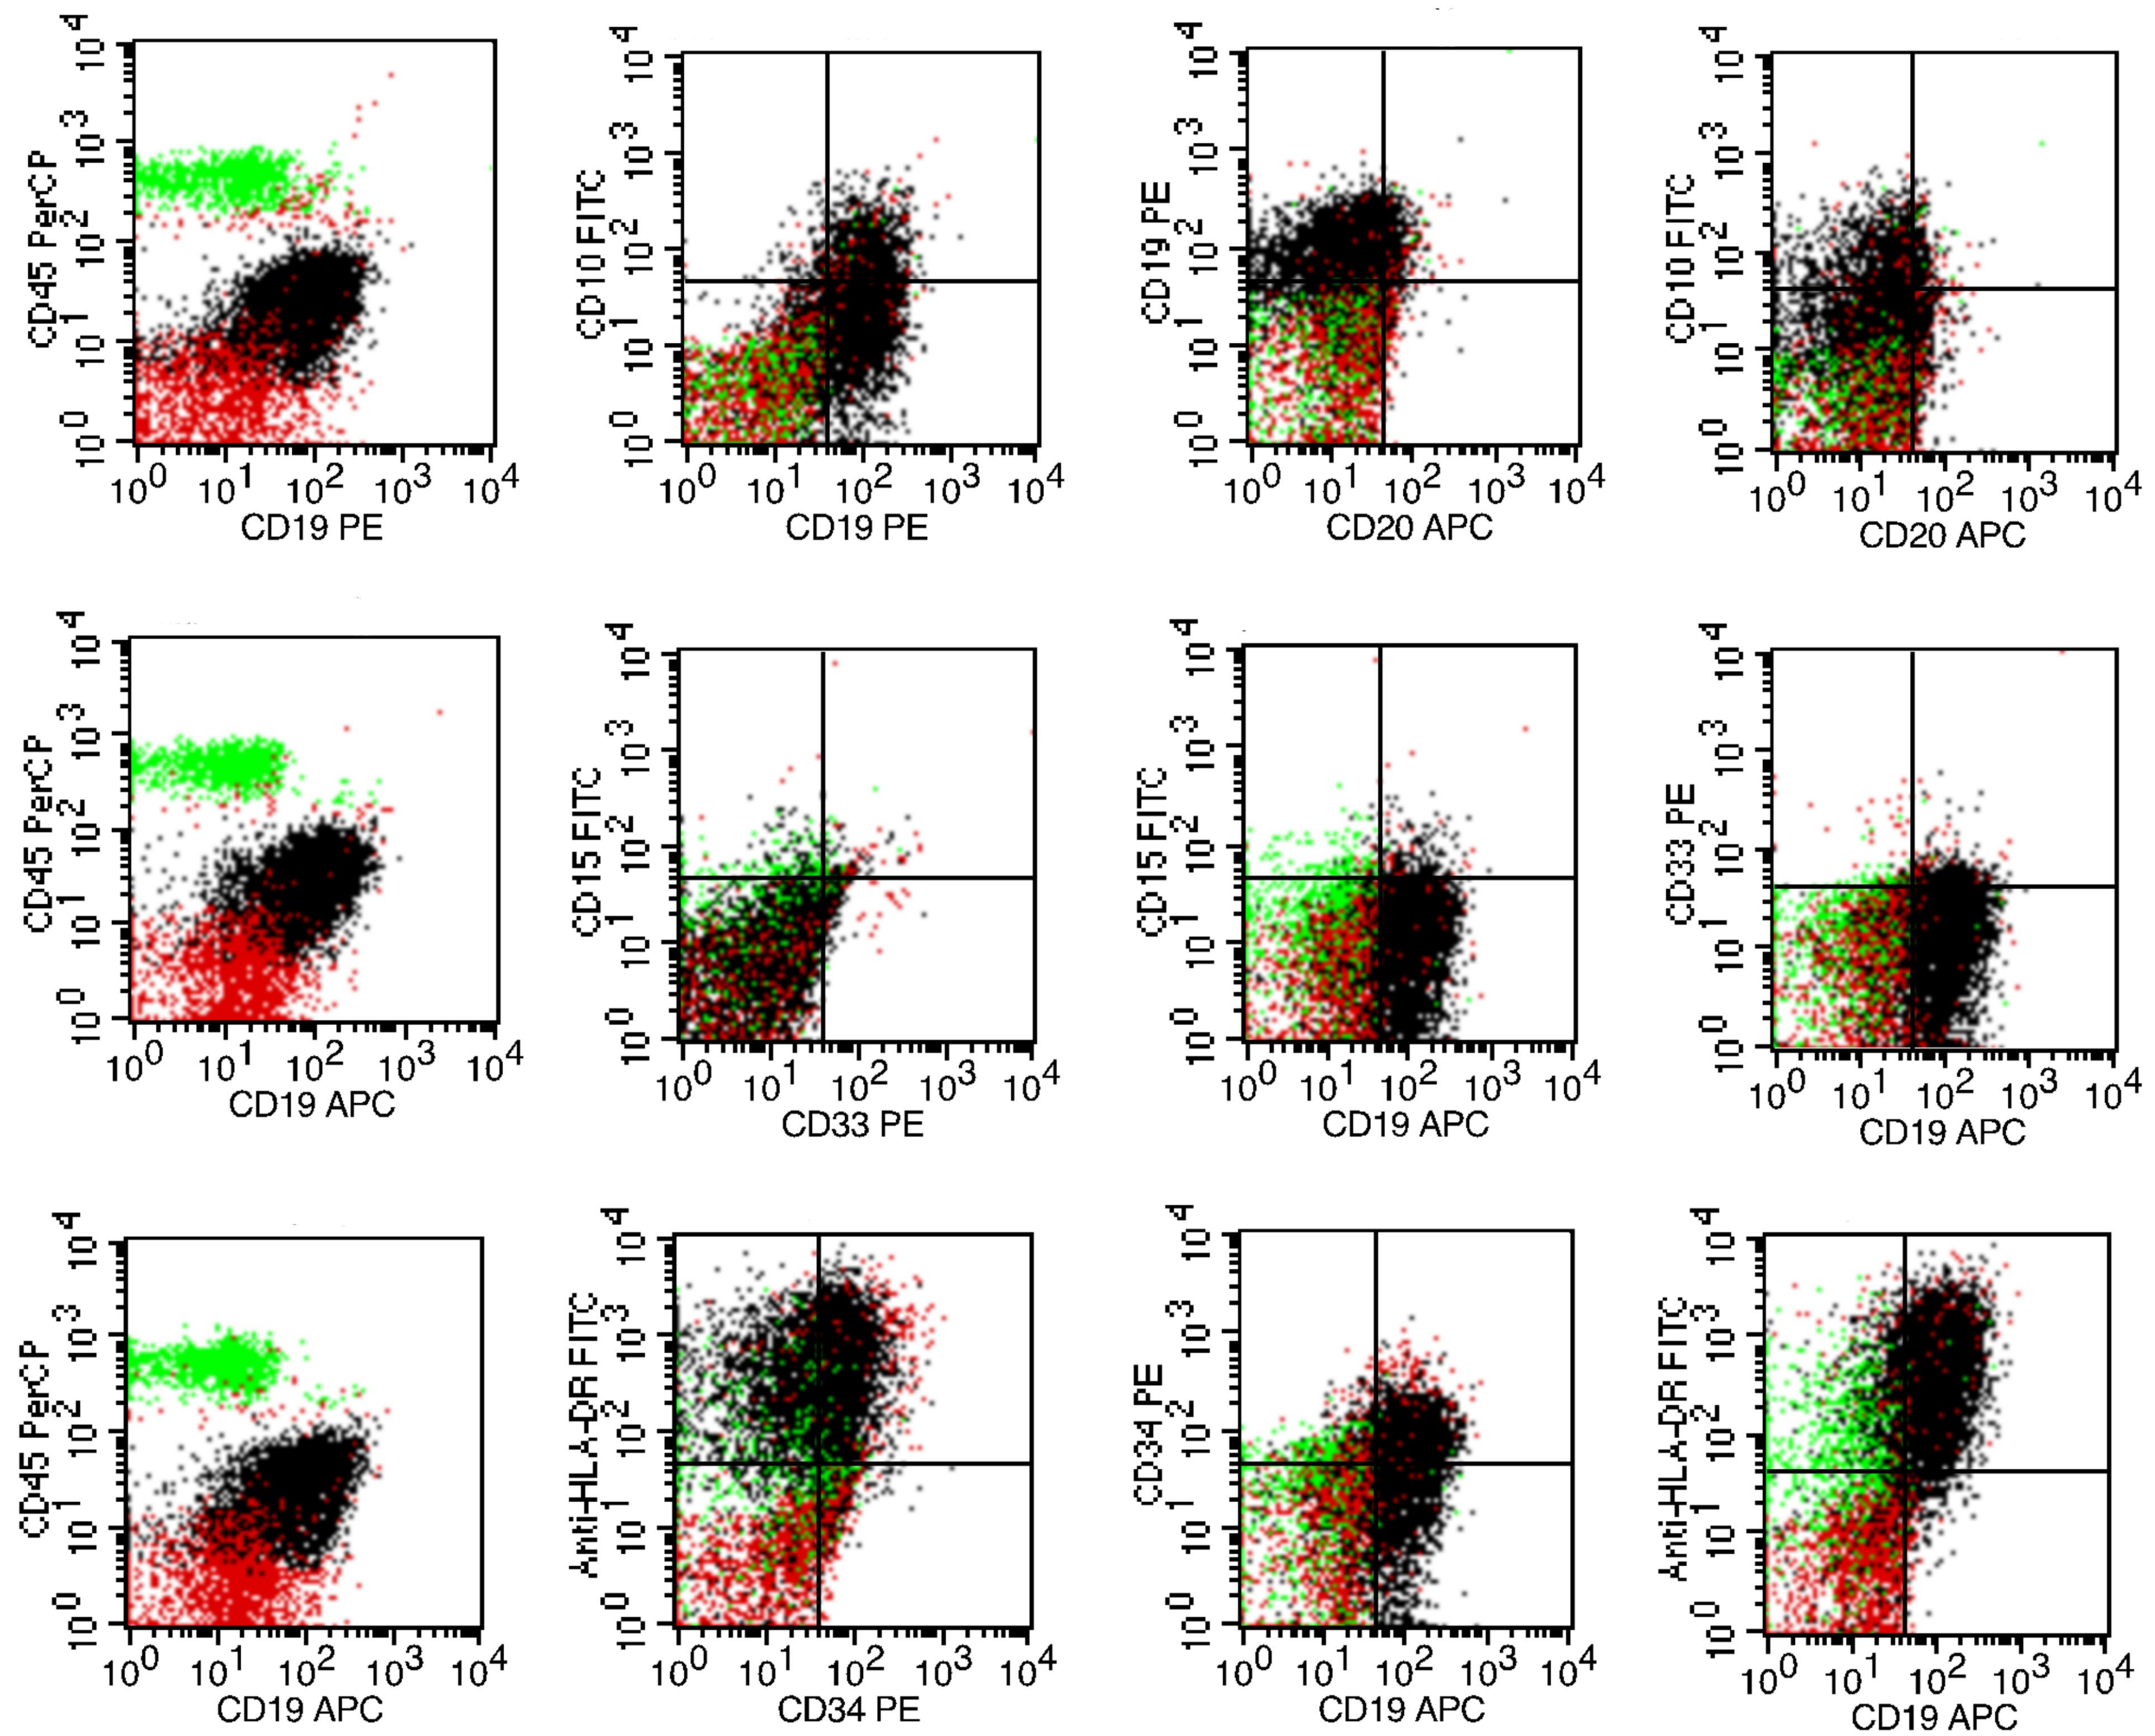

# Supplemental Figure 3

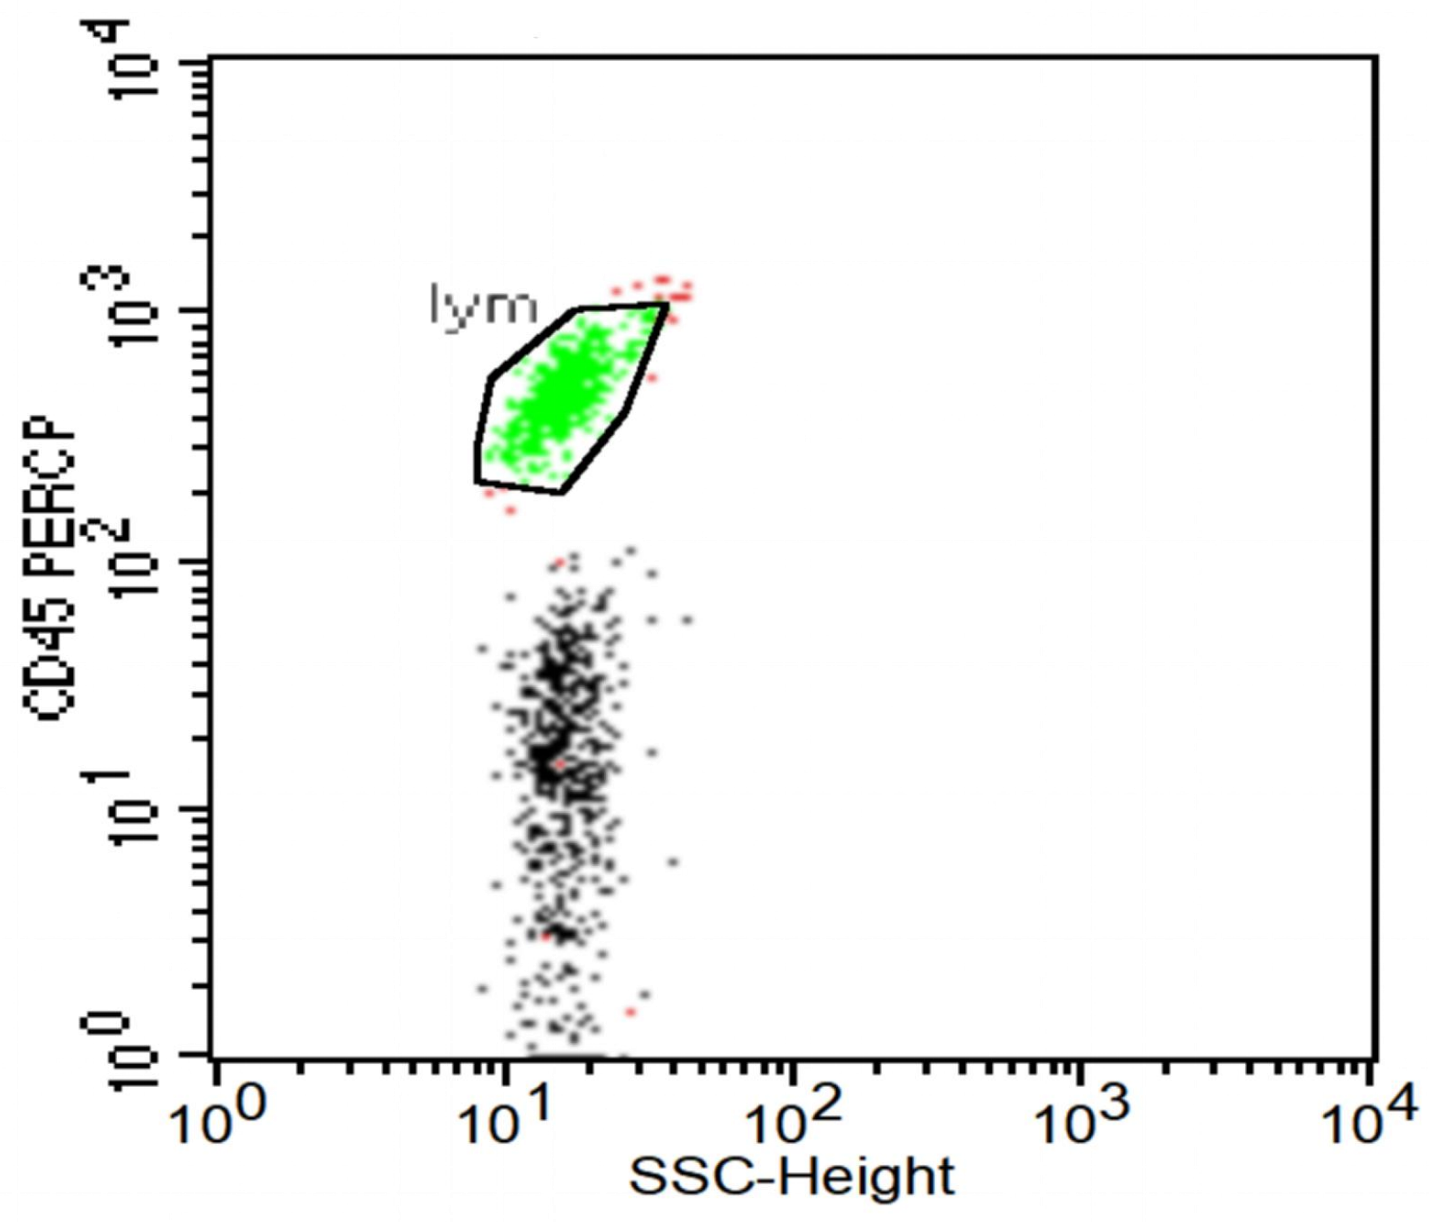

| Region | % Gated |
|--------|---------|
| lym    | 55.49   |
| R1     | 100.00  |
| R3     | 42.54   |
| R7     | 2.88    |

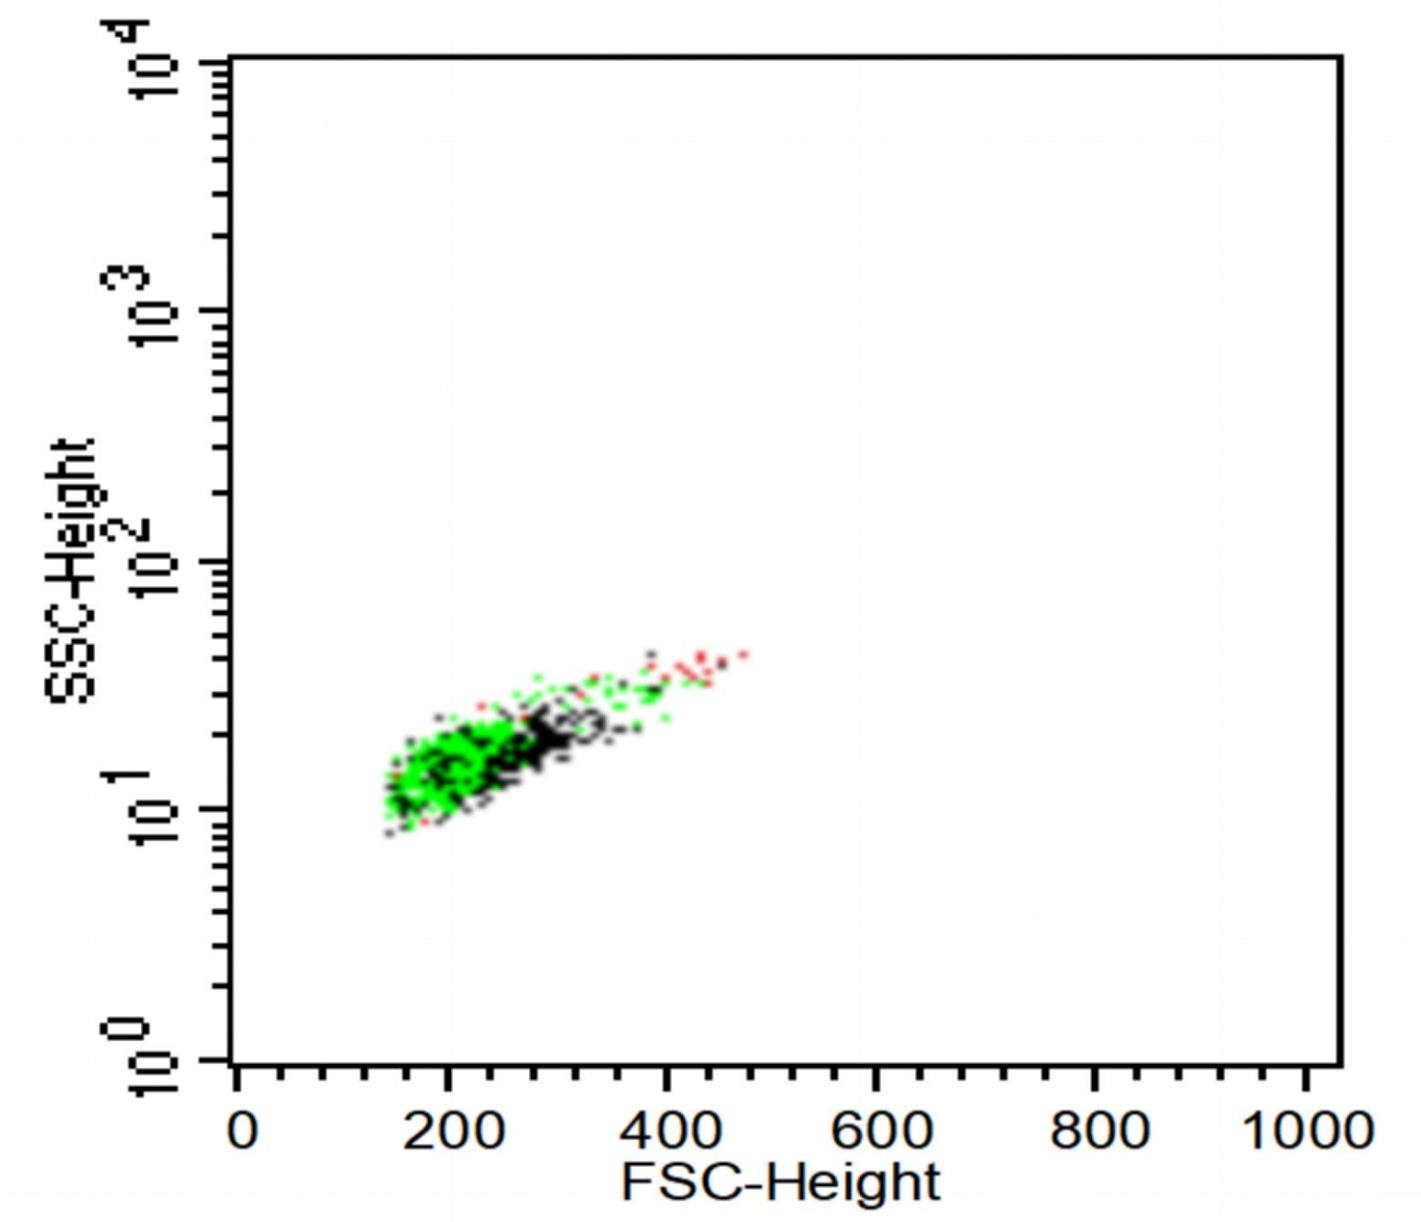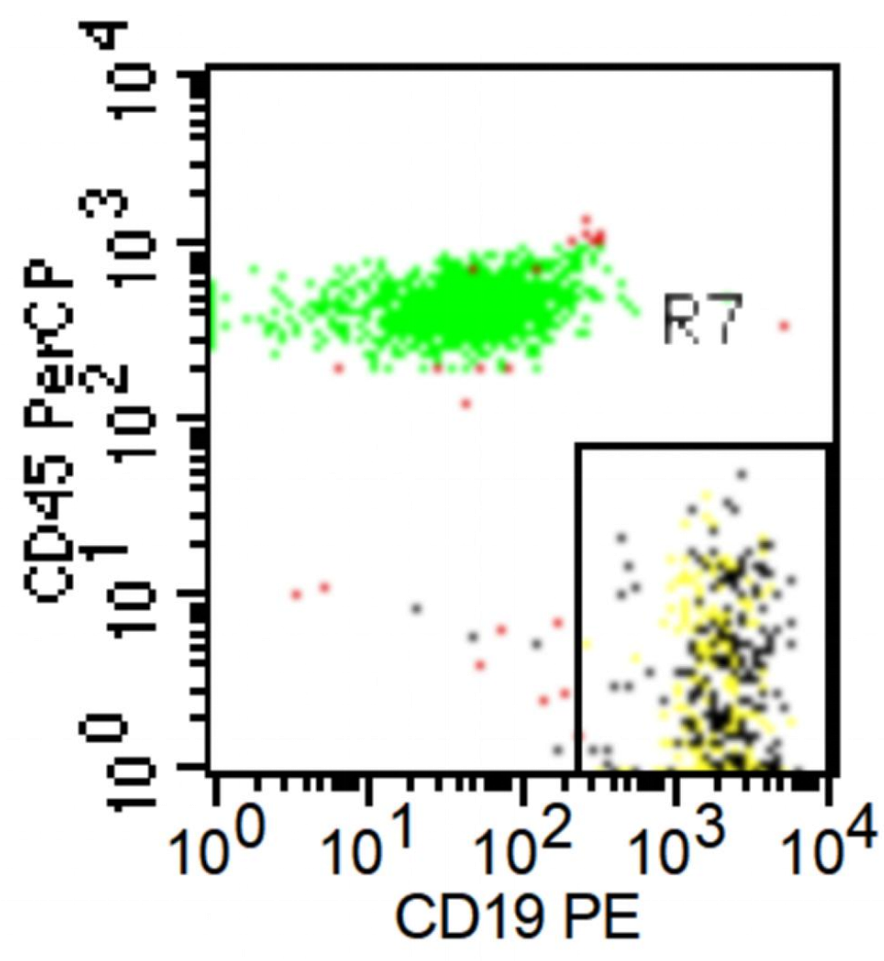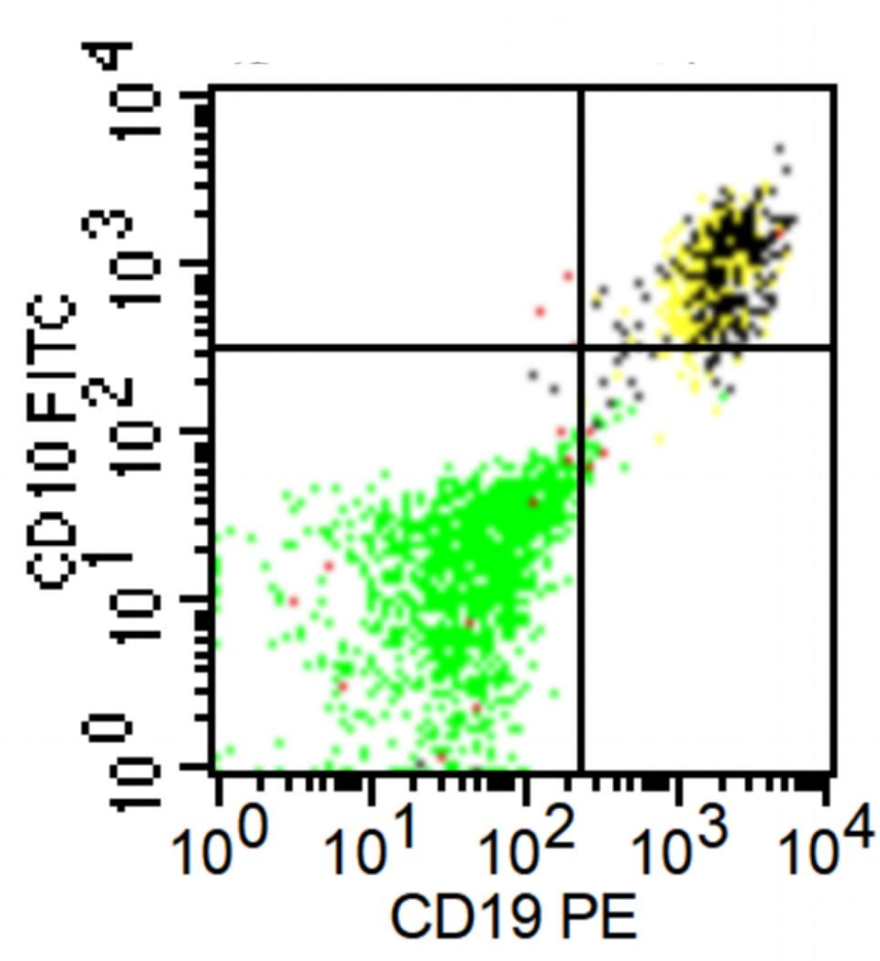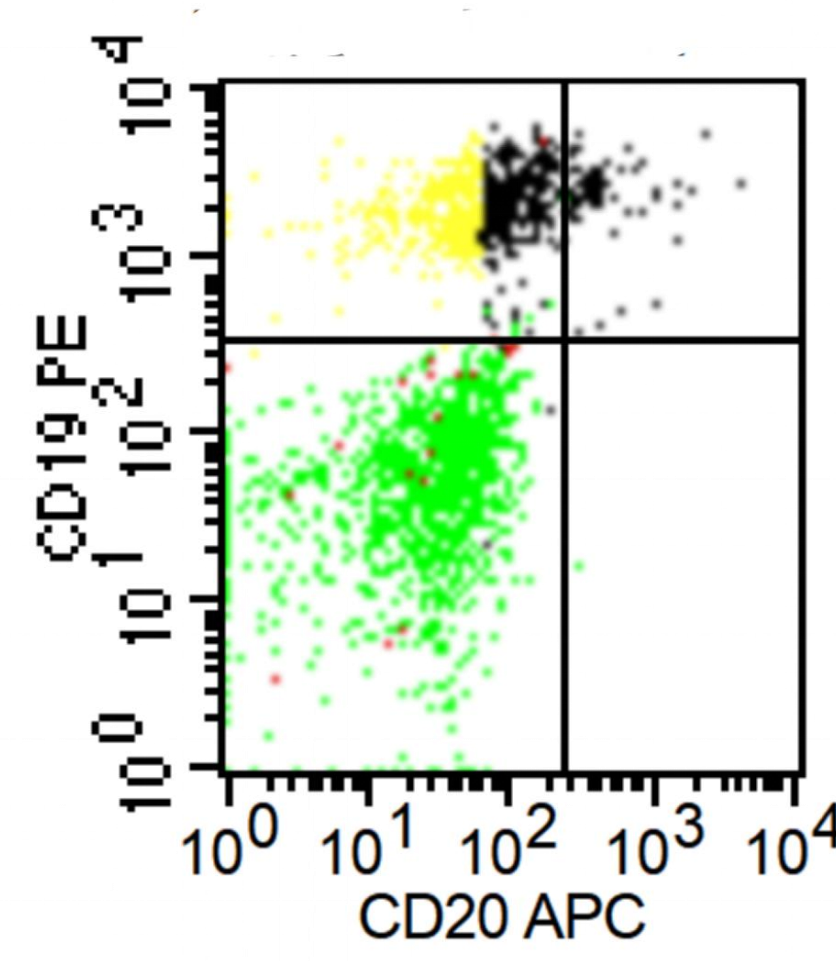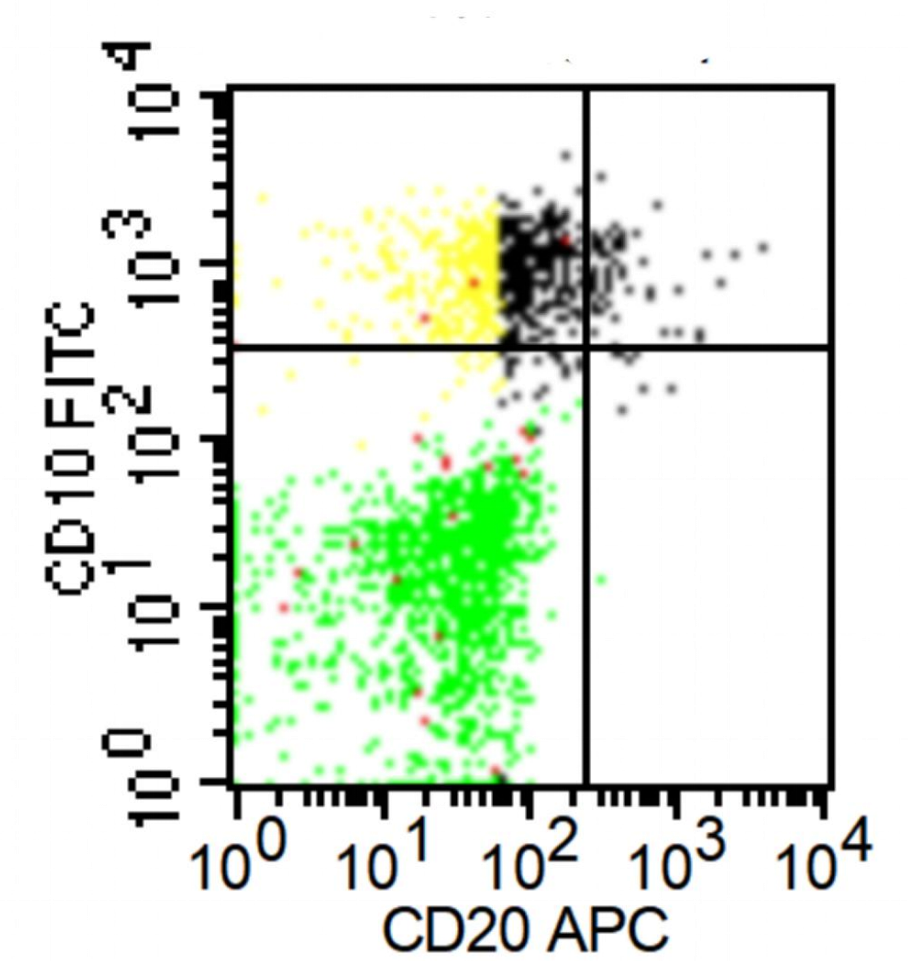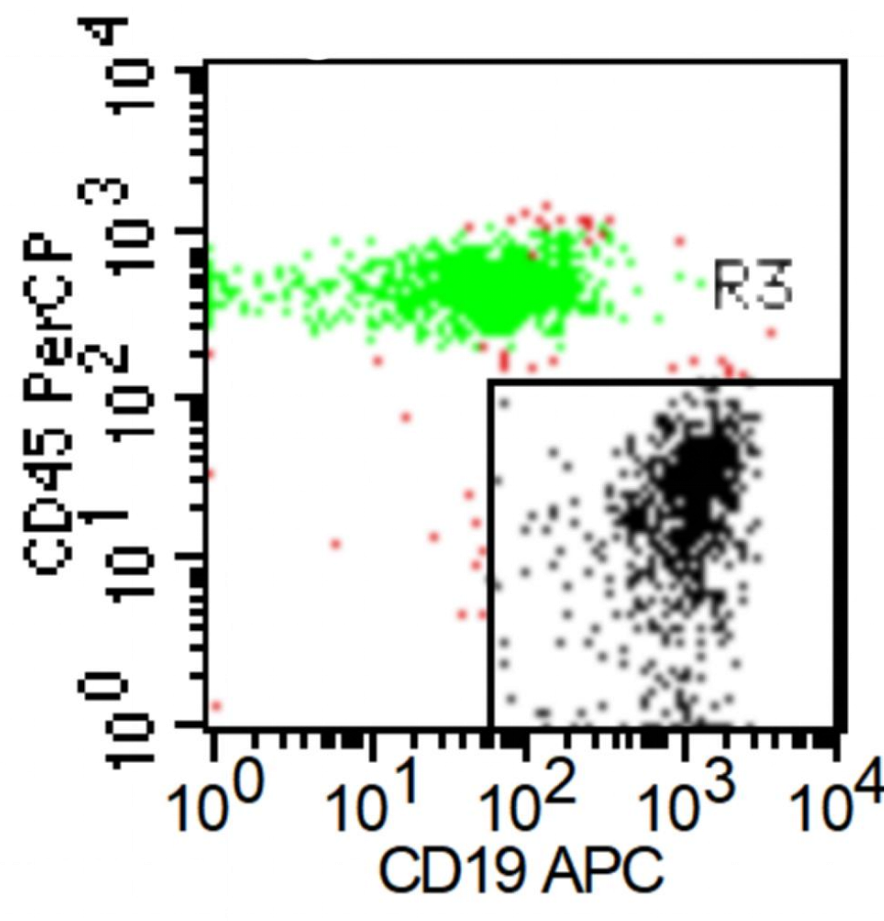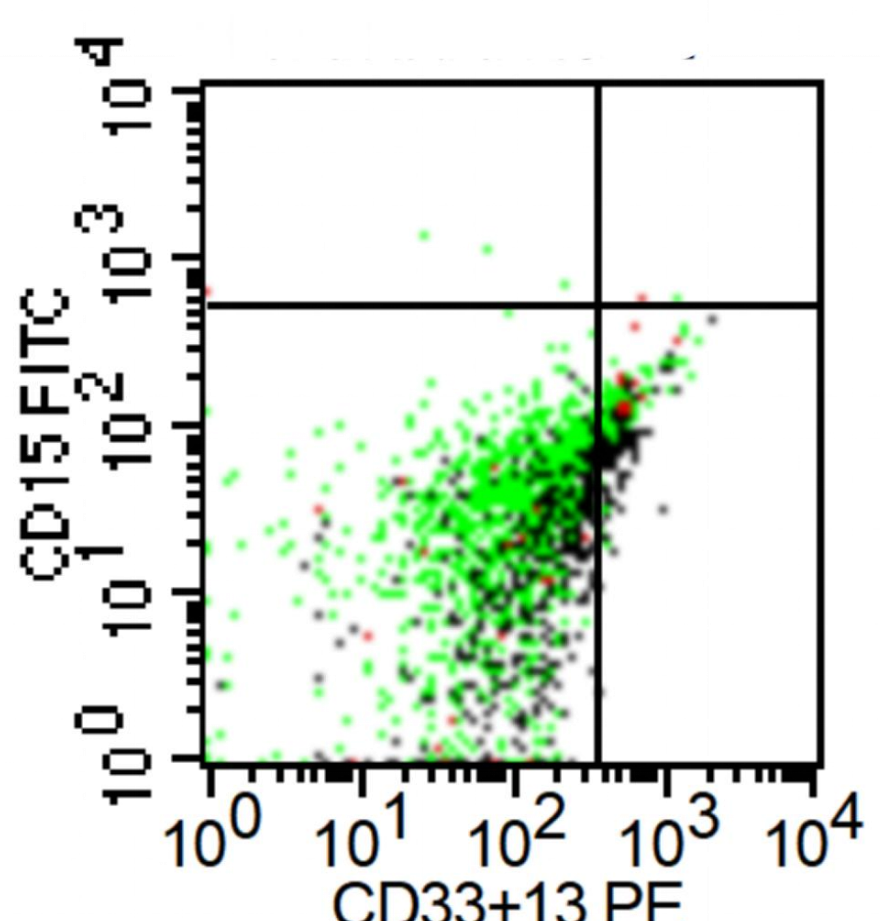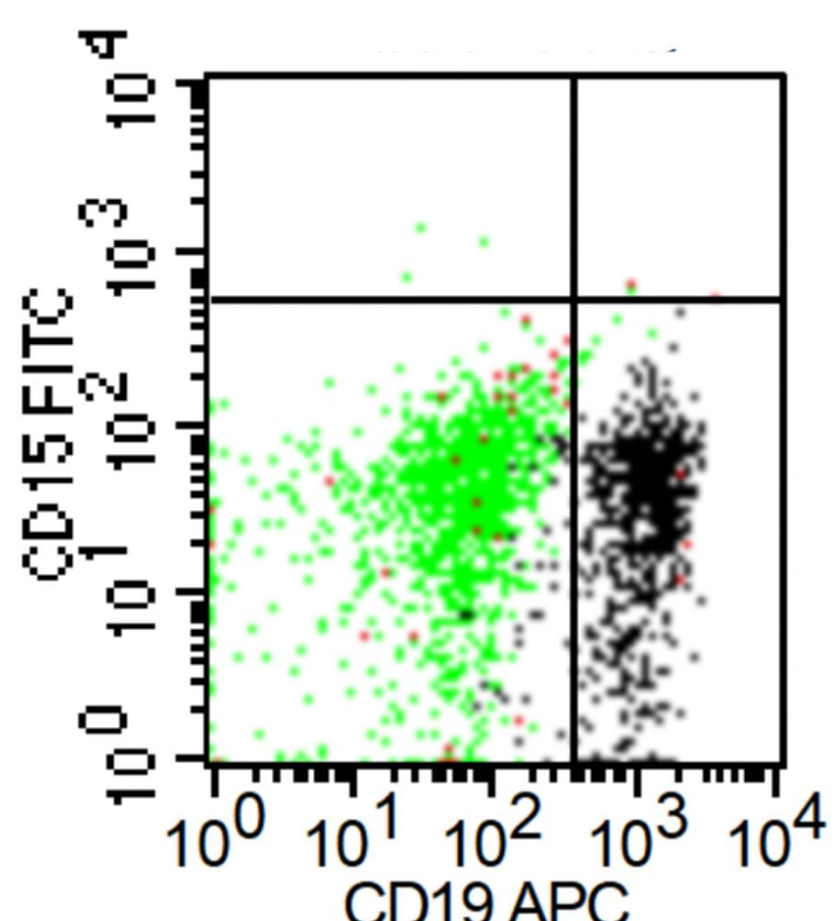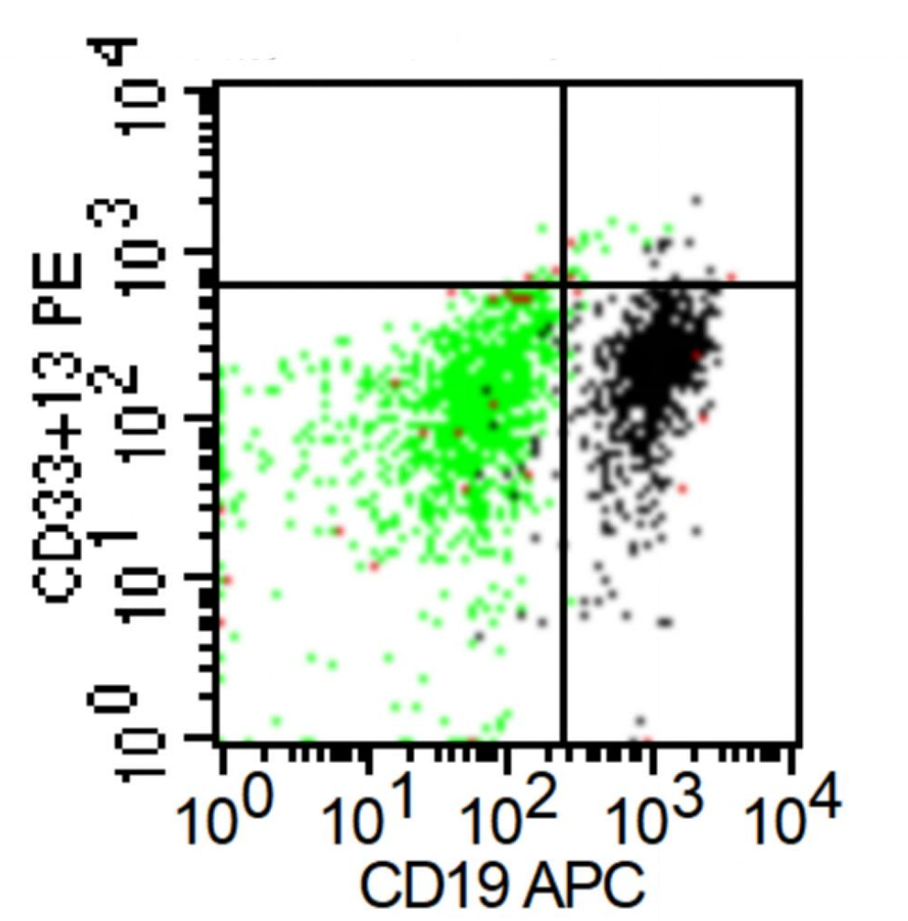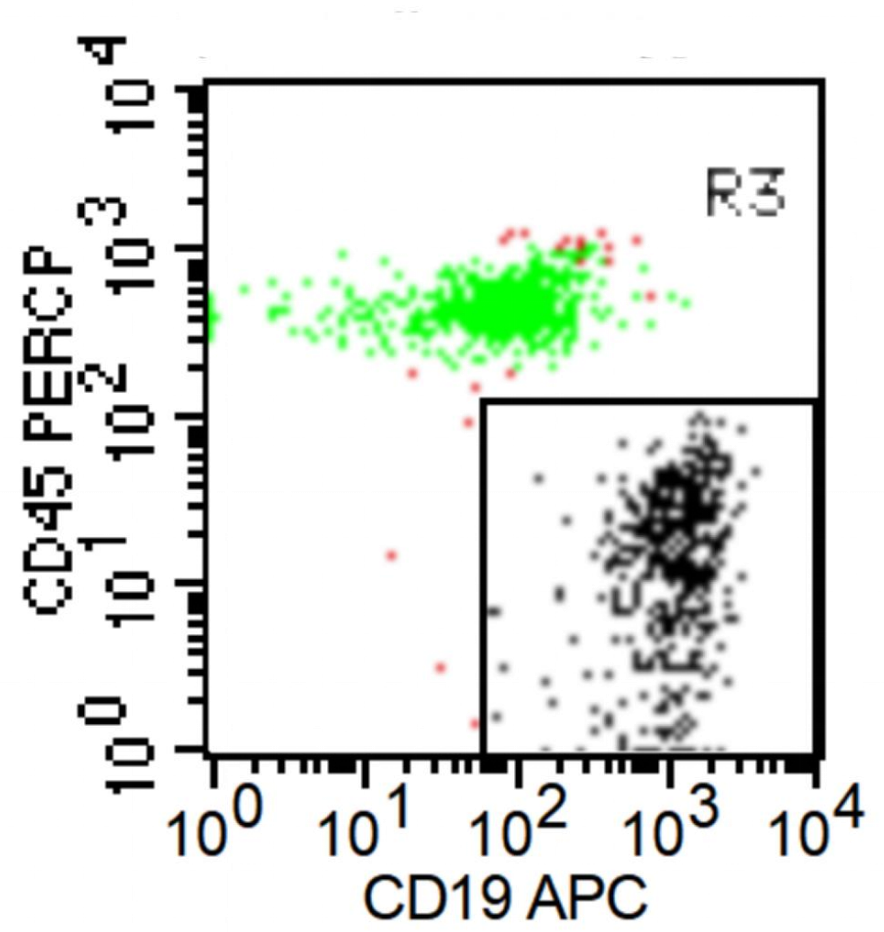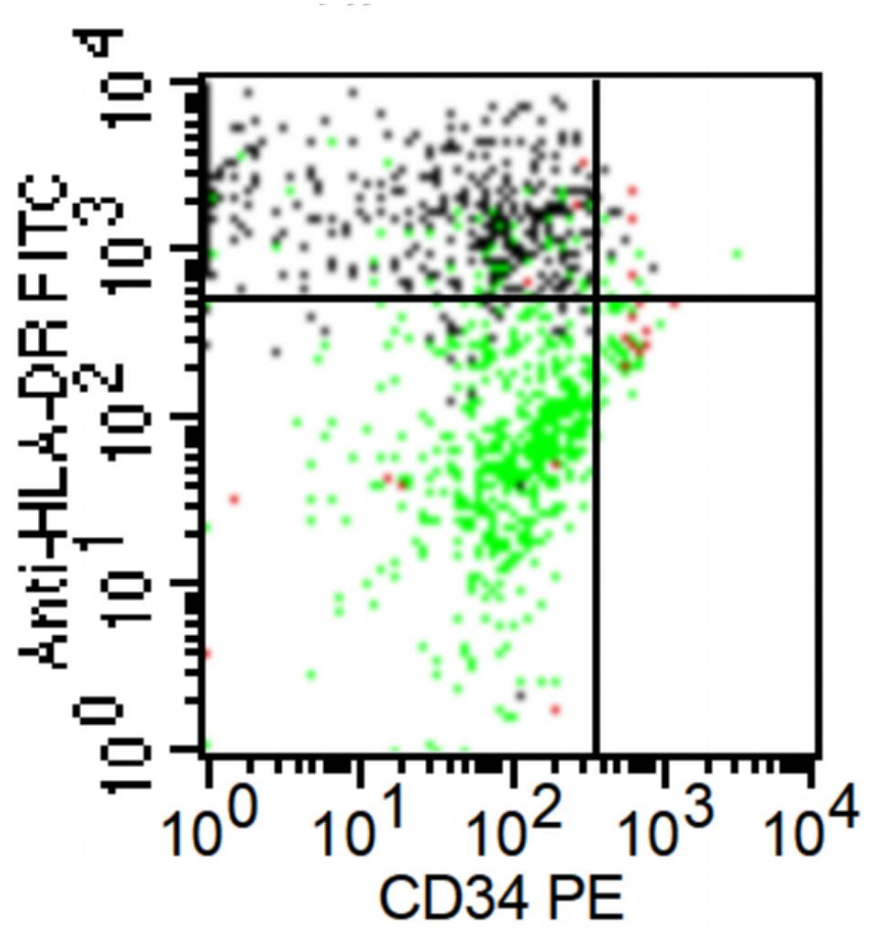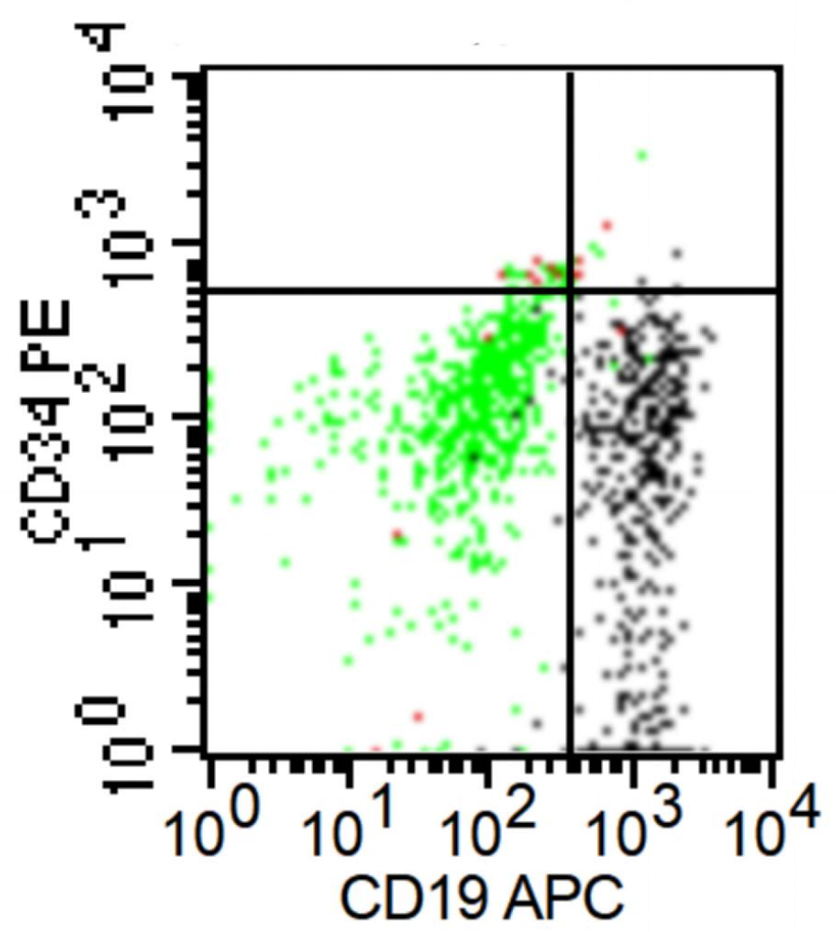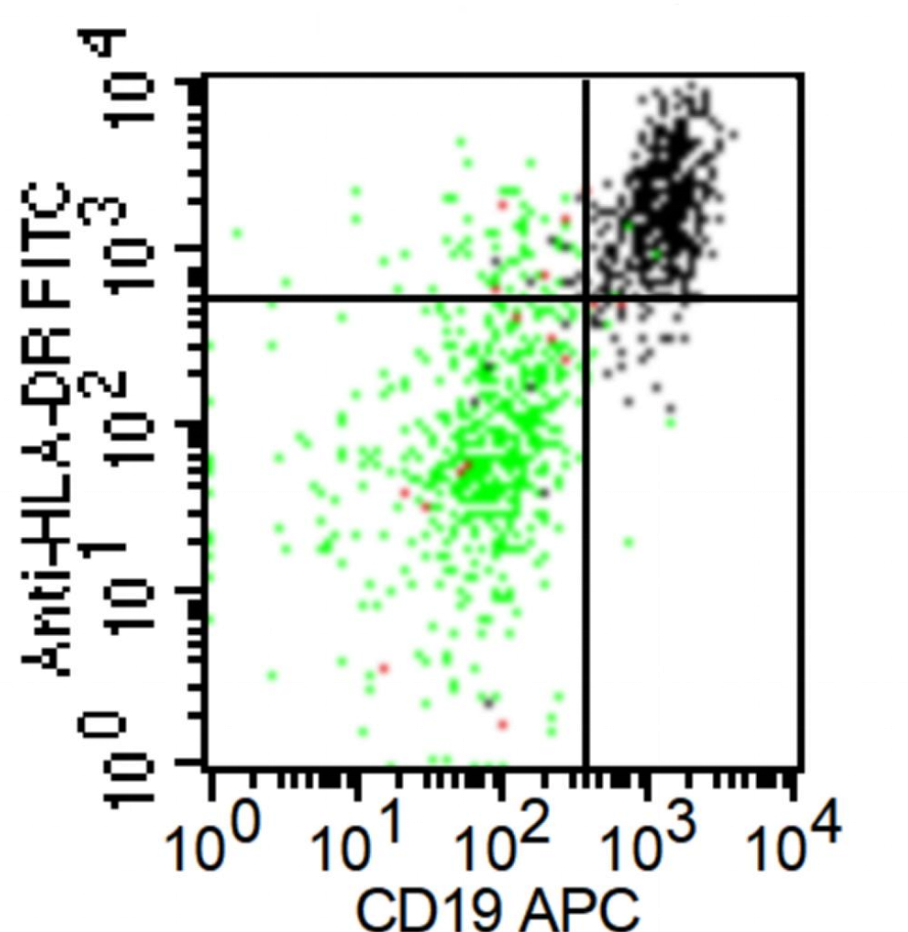

# Supplemental Figure 4

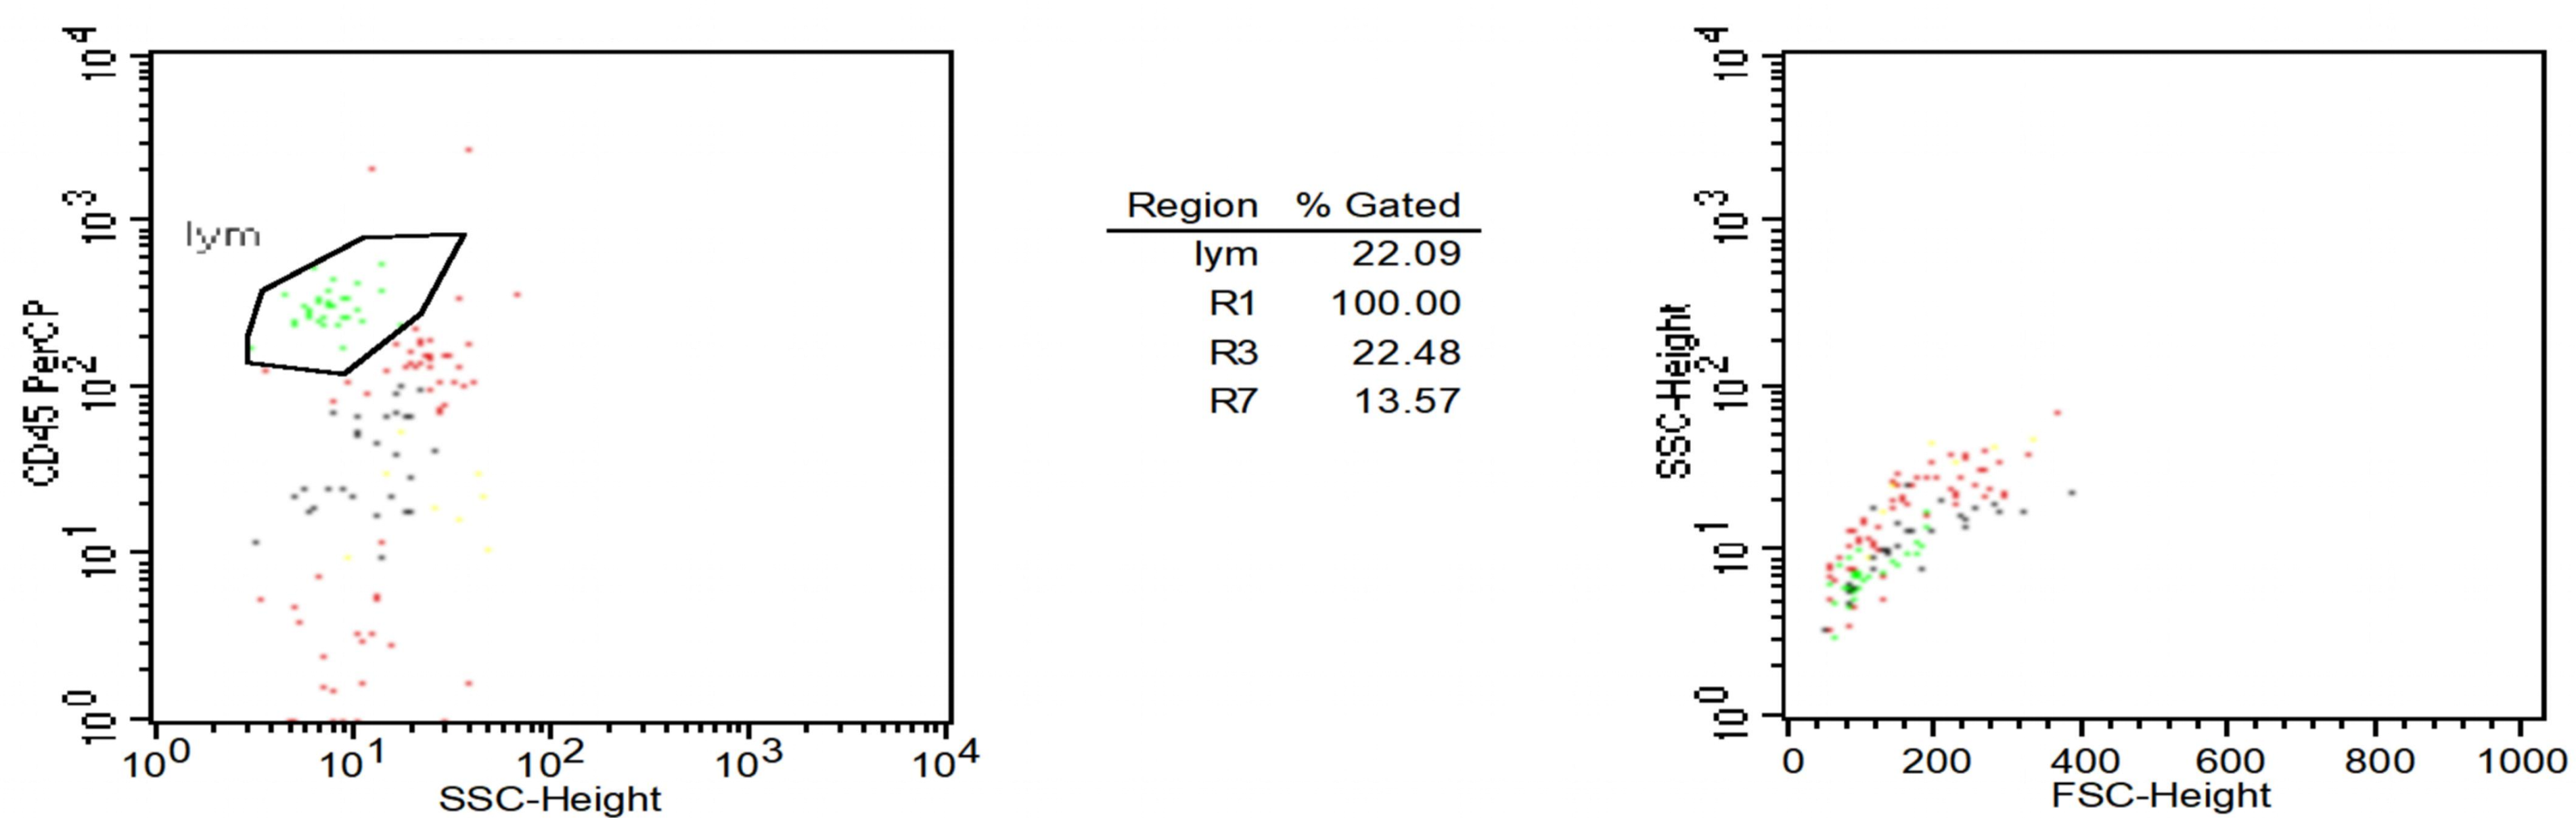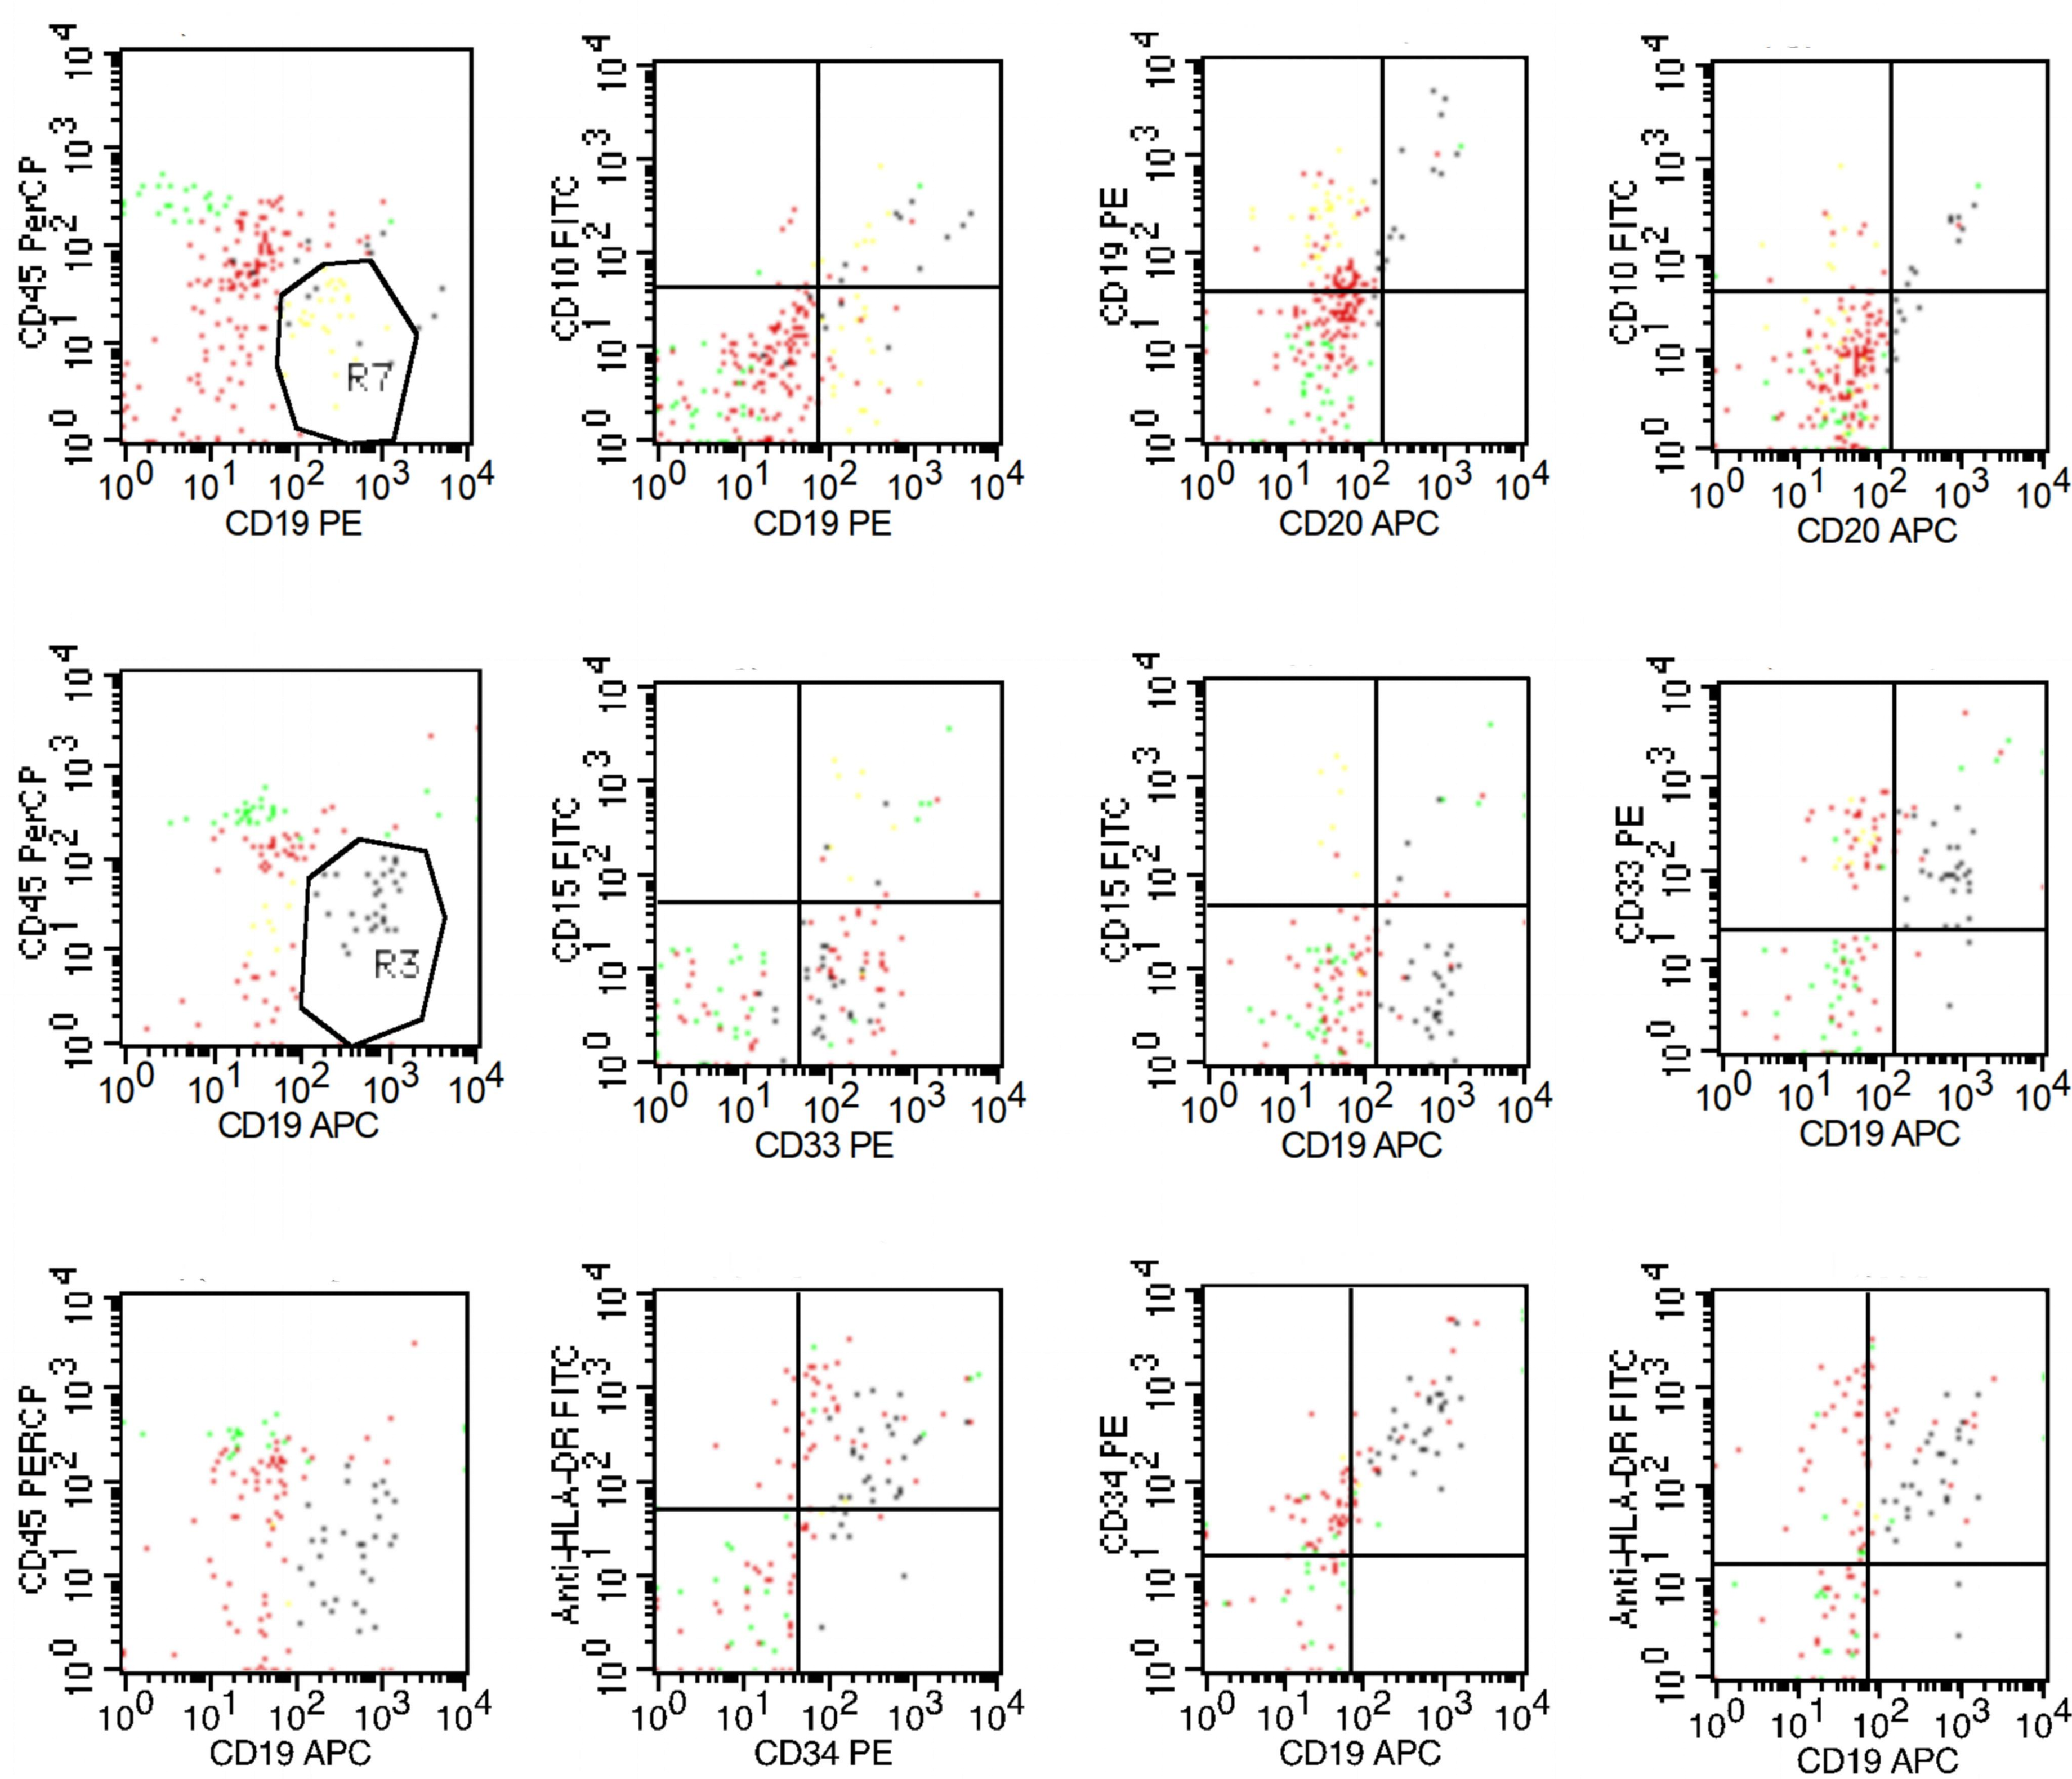

Supplement: Image_1.pdf [file Image_1.pdf]
